# Supplementary material for: Early Detection of Pancreatic Intraepithelial Neoplasias (PanINs) in Transgenic Mouse Model by Hyperpolarized 13C Metabolic Magnetic Resonance Spectroscopy
Source: Int J Mol Sci. 2020 May 25;21(10):3722. doi: 10.3390/ijms21103722 (PMC7279395; doi:10.3390/ijms21103722)
Supplement: Supplementary file 1 [file ijms-21-03722-s001.pdf]

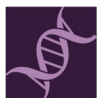

# Kinetic Modeling

A precise function was used to estimate the level of pyruvate over time. The function is of form:

$$f(t) = \begin{cases} 0 & t < t_s \\ \frac{r_p}{k_p} (1 - e^{-k_p(t-t_s)}) & t_s \leq t < t_e \\ f(t_e)e^{-k_p(t-t_e)} & t \geq t_e \end{cases}$$

where  $r_p$ ,  $k_p$ ,  $t_s$ , and  $t_e$  are estimated by minimizing the error sum of squares.

After estimation of these parameters, we estimate the alanine-to-pyruvate and lactate-to-pyruvate ratios over time. The fitted functions are of the form:

$$g(t) = \begin{cases} 0 & t < t_s \\ \frac{k_{px}r_p}{k_p - k_x} \left( \frac{1 - e^{-k_x(t-t_s)}}{k_x} - \frac{1 - e^{-k_p(t-t_s)}}{k_p} \right) & t_s \leq t < t_e \\ \frac{f(t_e)k_{px}}{k_p - k_x} (e^{-k_x(t-t_e)} - e^{-k_p(t-t_e)}) + g(t_e)e^{-k_x(t-t_e)} & t \geq t_e \end{cases}$$

where  $x$  represent alanine and lactate, and  $k_{px}$ ,  $k_x$  are estimated by minimizing the error sum of squares. The fitted plots are shown in the article Figure 3 C and the parameters are listed in Table 1

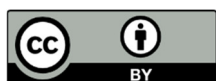

© 2020 by the authors. Submitted for possible open access publication under the terms and conditions of the Creative Commons Attribution (CC BY) license (<http://creativecommons.org/licenses/by/4.0/>).
